# Supplementary material
Source: PubMed Central journal article supplement (PMC7365811)

## **Materials and Methods**

### **Cell Culture**

Raw 264.7 macrophage cells were maintained in RPMI supplemented with 10% fetal bovine serum, penicillin-streptomycin (Penicillin, 100 I.U./ml/Streptomycin, 100µg/ml), and L-glutamine (4.5g/L).

### **Preparation of LAB Strains and treatment of Raw 264.7 cells**

LAB stains (*Lactobacillus paracasei* DKL121 and *Lactobacillus plantarum* DKL 119) were isolated from home-made or commercial Korean Kimichi from different regions in Korea. Established strain *Lactobacillus rhamnosus* (LGG) as well as Kimichi derived LAB were cultured in Lactobacillus MRS broth (Difco, MD) at 37°C overnight. The conditional medium was then collected and filtered using 0.22µm filters. The supernatants were stored in -80°C for use. Cultured Raw 264.7 cells were incubated with or without 10% LGG-CM, 119-CM or 121-CM in culture media for 0.5 h, 1.5h or 3 h then washed with PBS and collected for western blot, RNA extraction and immunofluorescence microscopy.

### **Immunoblotting**

Cultured cells were rinsed twice with ice-cold PBS, lysed in protein loading buffer (50 mM Tris, pH 6.8, 100 mM dithiothreitol, 2% SDS, 0.1% bromophenol blue, 10% glycerol), and then sonicated. Equal amounts of protein were separated by SDS-polyacrylamide gel electrophoresis, transferred to nitrocellulose, and immunoblotted with primary antibodies. The membrane was incubated with the following primary antibodies: anti-VDR (Santa Cruz Biotechnology Inc., CA), anti-LC3B, (Cell Signal, Beverly, MA) and anti-β-actin (Sigma-Aldrich, Milwaukee, WI, USA) antibodies and

visualized by ECL. Membranes that were probed with more than one antibody were stripped before re-probing.

### **Real Time quantitative PCR**

Total cellular RNA was obtained by TRIzol reagent (Thermo Fisher, USA) according to the manufacturer's protocol. VDR and autophagic markers ATG16L1 and Beclin1 were measured by real-time PCR. The sequences of the primers were shown in **Table 1**. All the gene expression levels were normalized to  $\beta$ -actin through  $2^{-\Delta\Delta Ct}$  method.

### **Immunofluorescence**

Cells were fixed with 100% Ethanol for 30 min and permeabilized with 0.1% Triton X-100 for 10 min. Normal goat serum was performed to block the non-specific antigen. The primary antibody against LC3B was added and the cells were incubated overnight at 4°C. After incubating with Alexa Fluor 549 anti-Rabbit secondary antibody for 1h, coverslips were mounted by fluoromount-G (SouthernBiotech, USA). Images were photographed using Zeiss laser scanning microscope (LSM 710 (Carl Zeiss Inc., Oberkochen, Germany)).

## Figure Legends

**Figure 1. mRNA Expression of VDR and autophagy markers in Raw 264.7 cells treated with probiotic-cm.** Time course of mRNA levels of VDR (a), ATG16L1 (b) and Beclin1 (c) in Raw 264.7 cells treated with LGG-CM, 119-CM or 121-CM for 0.5h, 1.5h and 3h. LGG-CM and 121-CM induced VDR expression, while neither of the LAB strains induced expression of ATG16L1 or Beclin1. Data is expressed as mean +/- SEM. n=3, two-way ANOVA test, \*P<0.05, \*\*P<0.01, \*\*\*P<0.001 and \*\*\*\*P<0.0001 compared to non-treated control group.

**Figure 2. Protein Expression of VDR and autophagy markers in Raw 264.7 cells treated with probiotic-cm.** (a) Protein levels of VDR and LC3B in LGG-CM, 119-CM and 121-CM treated Raw 264.7 cells for 0.5h, 1.5h and 3h. (b) Graphical representation of the quantification of VDR and LC3BI/II protein levels. Data are expressed as mean +/- SEM. n=2, two-way ANOVA test, \*P<0.05, \*\*P<0.01 and \*\*\*P<0.001 compared to non-treated control group. (c) LC3B immunofluorescence of HCT 116 and Raw 264.7 cells after 30-minute treatment with LGG conditioned media. LGG-CM induced LC3B expression (red) in both cell types, while expression was higher in the HCT 116 cells line.

# Supplemental Figure 1

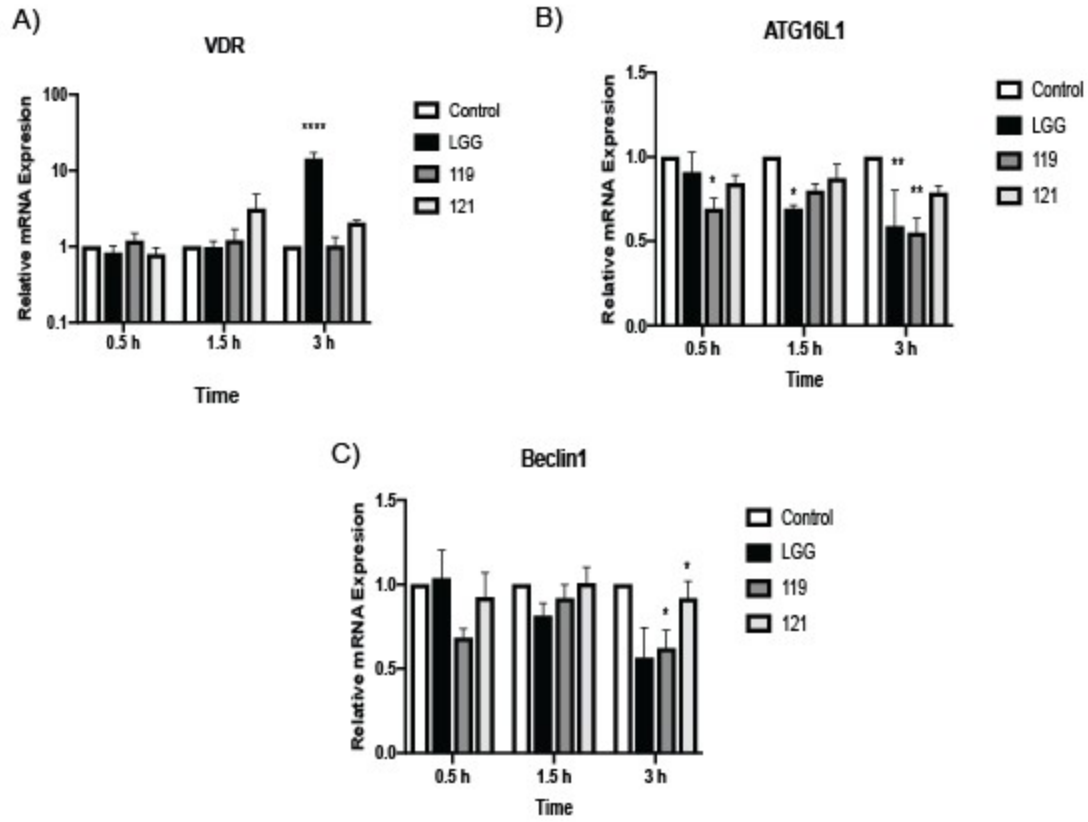

Supplemental Figure 2

A

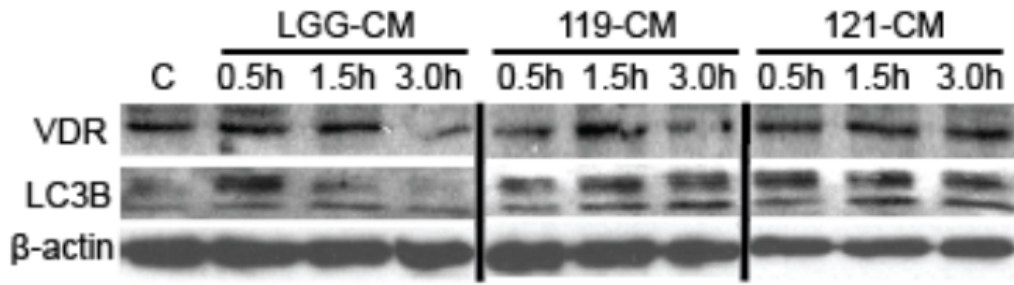

B

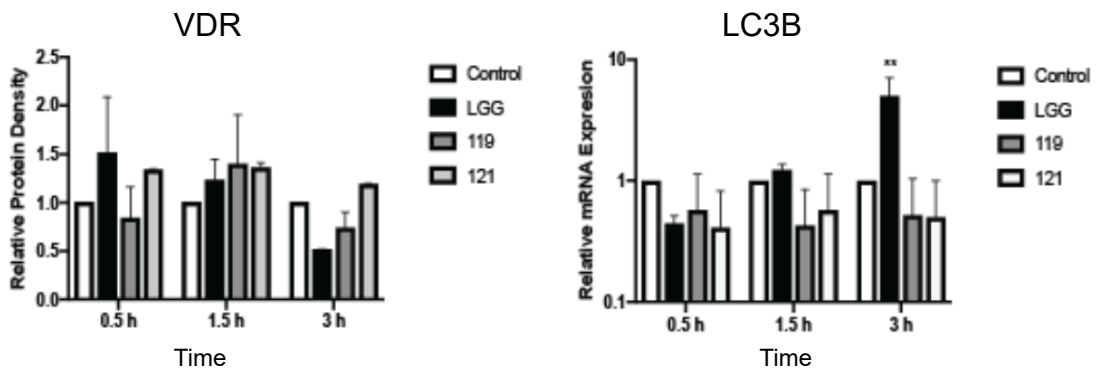

C

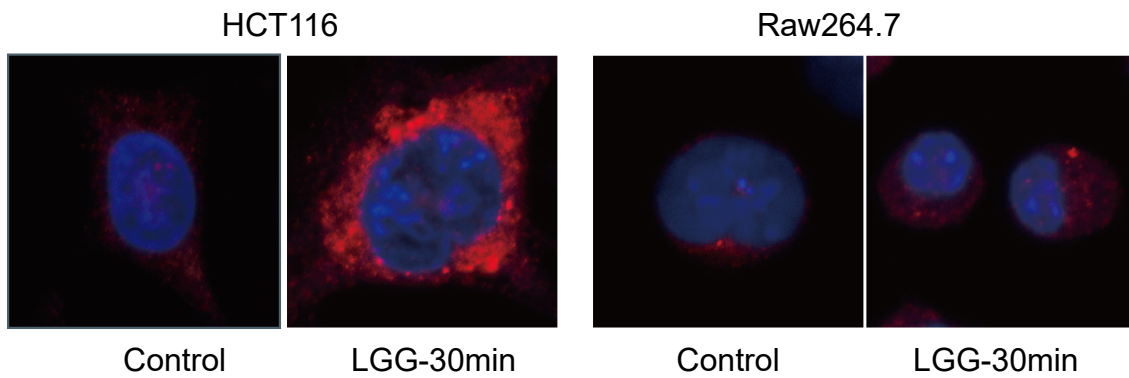

Supplement: izaa049_suppl_supplemental_figures_and_methods.pdf [file izaa049_suppl_supplemental_figures_and_methods.pdf]
